# Supplementary material for: Self-organised segregation of bacterial chromosomal origins
Source: eLife journal article supplement (doi:10.7554/elife.46564), 2019-08-09
Supplement: supp [file elife-46564-supp-v1.zip]

Archive with 16 entries (16 files):
- elife_poa_e46564_Figure_2_figure_supplement_2.ai
- elife_poa_e46564_Figure_2_figure_supplement_1.ai
- elife_poa_e46564_Figure_4_figure_supplement_1.ai
- elife_poa_e46564_Figure_7_figure_supplement_1.ai
- elife_poa_e46564_Figure_4_figure_supplement_2.ai
- elife_poa_e46564_Transparent_Reporting_File.pdf
- elife_poa_e46564_Figure_2_figure_supplement_3.ai
- elife_poa_e46564_Figure_5_figure_supplement_2.ai
- elife_poa_e46564_Figure_1_source_data_1.zip
- elife_poa_e46564_Figure_4_figure_supplement_3.ai
- elife_poa_e46564_Figure_2_figure_supplement_4.ai
- elife_poa_e46564_Figure_1_figure_supplement_1.ai
- elife_poa_e46564_Figure_2_figure_supplement_5.ai
- elife_poa_e46564_Figure_6_figure_supplement_1.ai
- elife_poa_e46564_Figure_3_figure_supplement_1.ai
- elife_poa_e46564_Figure_5_figure_supplement_1.ai
